# Supplementary material for: Chalcone-Acridine Hybrid Suppresses Melanoma Cell Progression via G2/M Cell Cycle Arrest, DNA Damage, Apoptosis, and Modulation of MAP Kinases Activity
Source: MDPI journal article supplement (doi:10.3390/ijms232012266), 2022-10-14
Supplement: s1 [file s1]

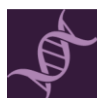

Supplement file

# Chalcone-acridine hybrid suppresses melanoma cell progression via G2/M cell cycle arrest, DNA damage, apoptosis, and modulation of MAP kinases activity

Maria Gazdova <sup>1</sup>, Radka Michalkova <sup>1</sup>, Martin Kello <sup>1</sup>, Maria Vilkova <sup>2</sup>, Zuzana Kudlickova <sup>2</sup>, Janette Baloghova <sup>3</sup>, Ladislav Mirossay <sup>1</sup> and Jan Mojzis <sup>1,\*</sup>

<sup>1</sup> Department of Pharmacology, Faculty of Medicine, Pavol Jozef Šafárik University, 040 01 Košice, Slovakia

<sup>2</sup> NMR Laboratory, Institute of Chemistry, Faculty of Science, Pavol Jozef Šafárik University, 040 01 Košice, Slovakia

<sup>3</sup> Department of Dermatovenereology, Faculty of Medicine, Pavol Jozef Šafárik University, 040 01 Košice, Slovakia

\* Correspondence: jan.mojzis@upjs.sk

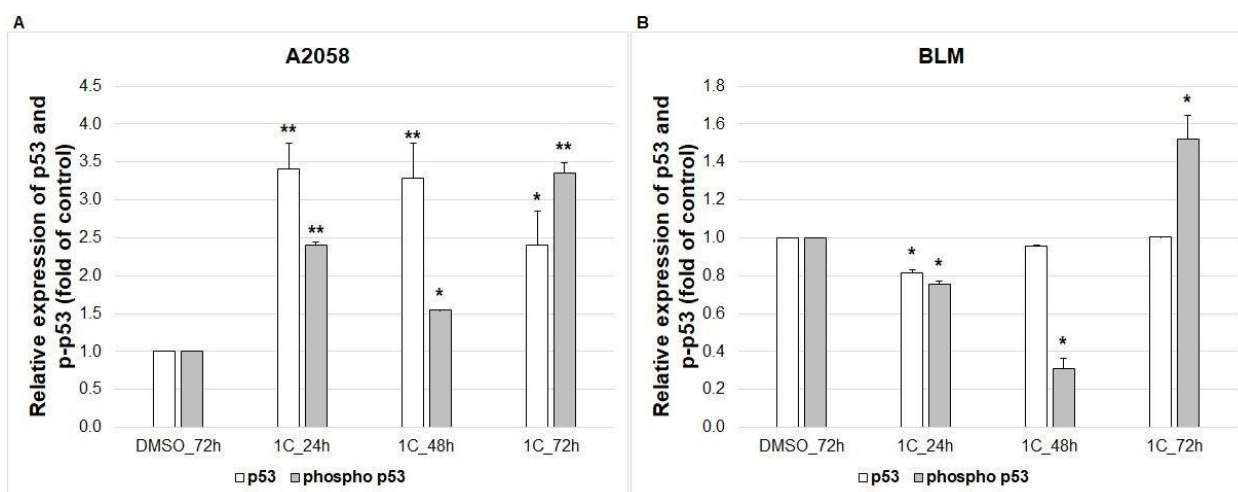

**Figure S1** Densitometry analysis of total and phosphor p53 protein WB in (A) A2058 and (B) BLM melanoma cells. \*  $p < 0.05$ , \*\*  $p < 0.01$  DMSO.

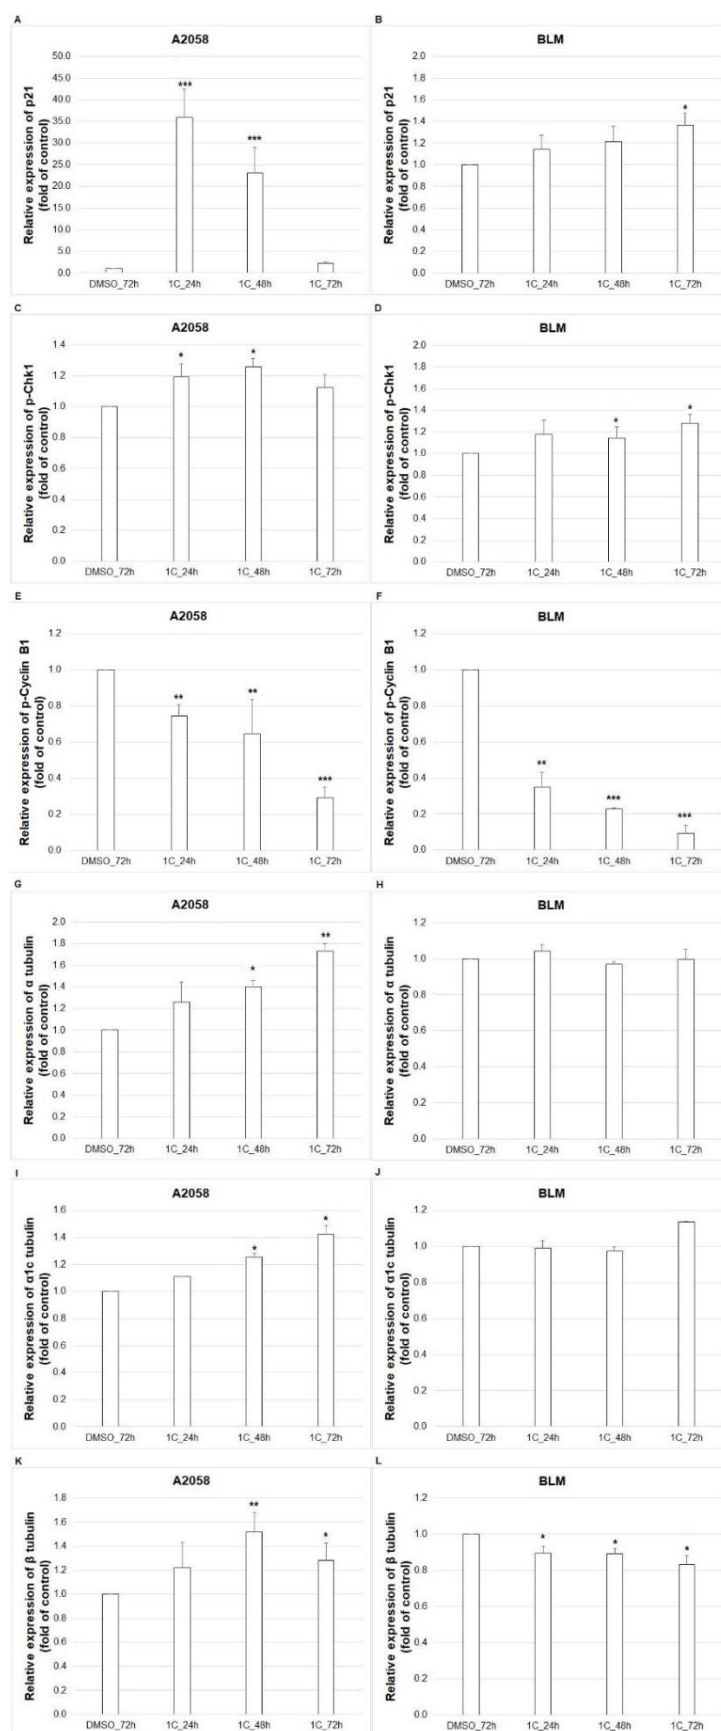

**Figure S2** Densitometry analysis of p21, p-Chk1, p-Cyclin B1,  $\alpha$ -/ $\alpha$ 1c-/ $\beta$  tubulins in (A,C,E,G,I,K) A2058 and (B,D,F,H,J,L) BLM melanoma cells. \*  $p < 0.05$ , \*\*  $p < 0.01$ , \*\*\*  $p < 0.001$  vs. DMSO.

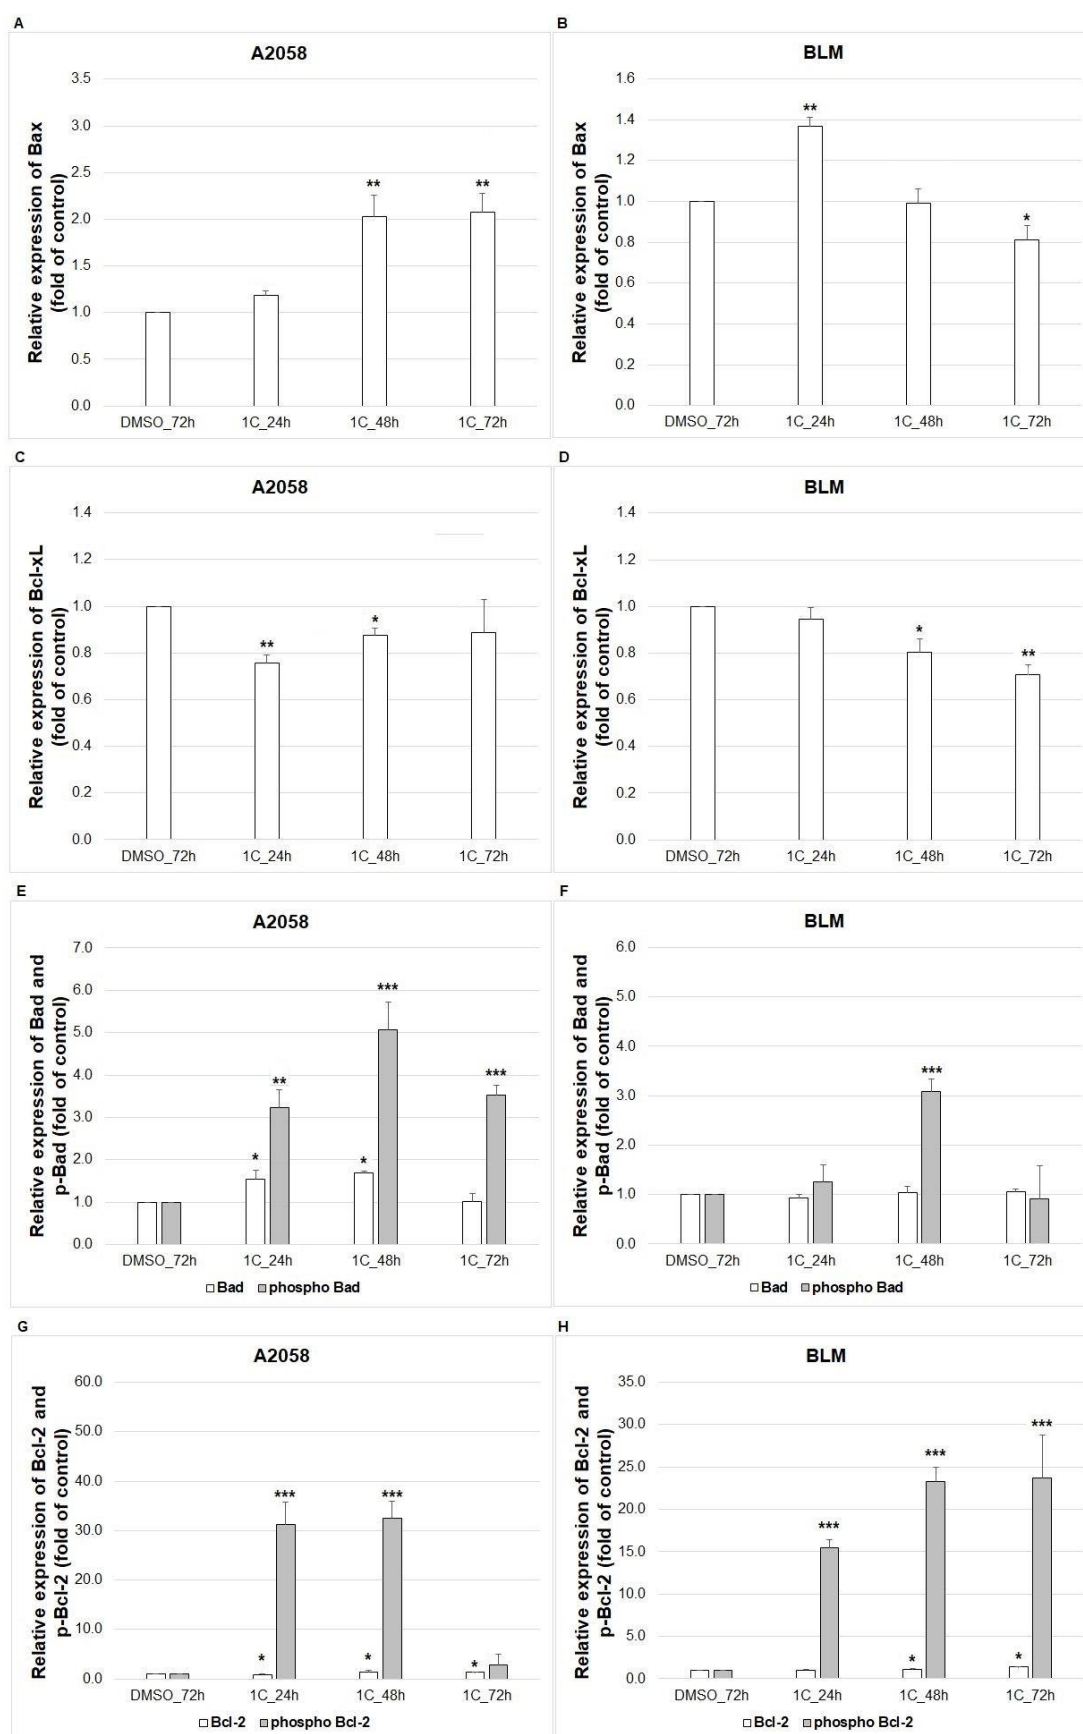

**Figure S3** Densitometry analysis of Bax, Bcl-xL, Bad and Bcl-2 proteins in (A,C,E,G) A2058 and (B,D,F,H) BLM melanoma cells. \*  $p < 0.05$ , \*\*  $p < 0.01$ , \*\*\*  $p < 0.001$  vs. DMSO.

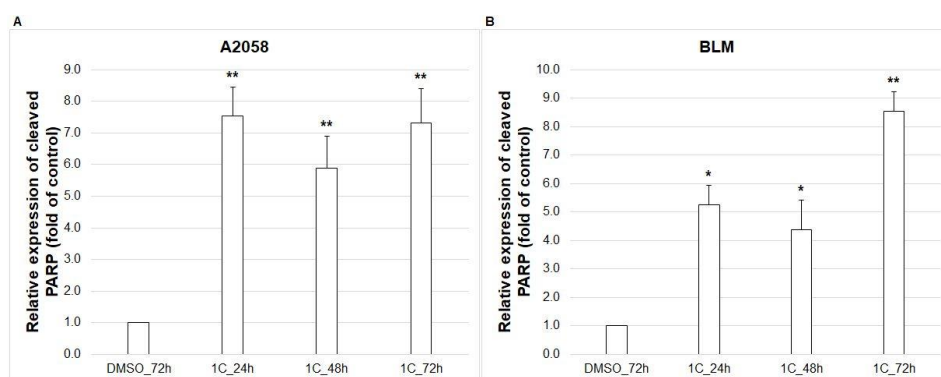

**Figure S4** Densitometry analysis of PARP proteins cleavage in (A) A2058 and (B) BLM melanoma cells. \*  $p < 0.05$ , \*\*  $p < 0.01$  vs. DMSO.

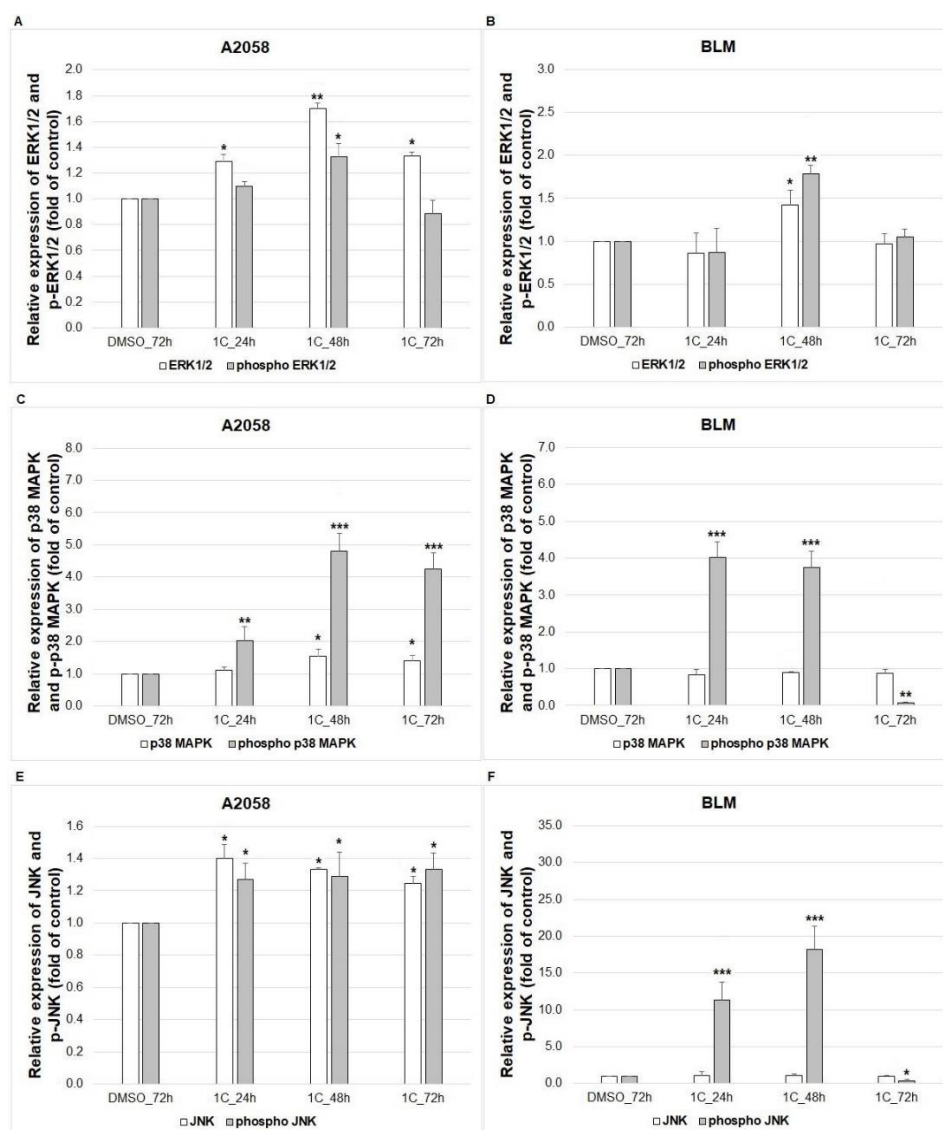

**Figure S5** Densitometry analysis of ERK 1/2, p38 MAPK, JNK proteins in (A,C,E) A2058 and (B,D,F) BLM melanoma cells. Statistical significance: \*  $p < 0.05$ , \*\*  $p < 0.01$ , \*\*\*  $p < 0.001$  vs. DMSO.
